# Supplementary material for: Using nasal sprays to prevent respiratory tract infections: a qualitative study of online consumer reviews and primary care patient interviews
Source: HighWire-hosted journal article supplement (doi:10.1136/bmjopen-2021-059661), 2022-06-01

## Supplementary material 2: Logic model

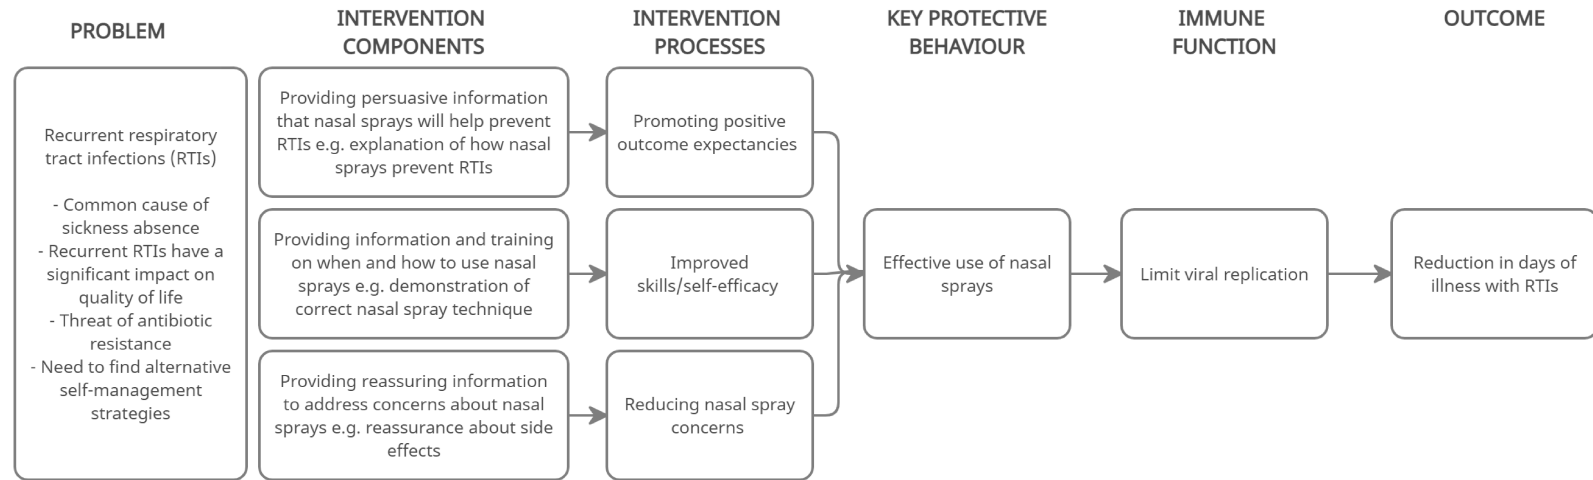

Supplement: bmjopen-2021-059661supp002_data_supplement.pdf [file bmjopen-2021-059661supp002_data_supplement.pdf]
